# Supplementary material for: Transcriptional profiling of sequentially generated septal neuron fates
Source: eLife journal article supplement (doi:10.7554/elife.71545), 2021-12-01
Supplement: supp [file elife-71545-supp-v1.zip]

Archive with 14 entries (14 files):
- elife_poa_e71545_Transparent_Reporting_File.docx
- elife_poa_e71545_Figure_1_figure_supplement_1.pdf
- elife_poa_e71545_Figure_1_figure_supplement_2.pdf
- elife_poa_e71545_Figure_1_figure_supplement_3.pdf
- elife_poa_e71545_Figure_3_figure_supplement_1.pdf
- elife_poa_e71545_Figure_4_figure_supplement_1.pdf
- elife_poa_e71545_Figure_5_figure_supplement_1.pdf
- elife_poa_e71545_Figure_2_source_data_1.xlsx
- elife_poa_e71545_Figure_3_source_data_1.xlsx
- elife_poa_e71545_Figure_3_figure_supplement_1_source_data_1.xlsx
- elife_poa_e71545_Figure_4_source_data_1.xlsx
- elife_poa_e71545_Figure_4_figure_supplement_1_source_data_1.xlsx
- elife_poa_e71545_Figure_5_source_data_1.xlsx
- elife_poa_e71545_Figure_5_figure_supplement_1_source_data_1.xlsx
