# Supplementary material for: Transcriptional profiling of sequentially generated septal neuron fates
Source: eLife journal article supplement (doi:10.7554/elife.71545), 2021-12-01
Supplement: supp [file elife-71545-supp-v1.zip › elife_poa_e71545_Figure_2_source_data_1.xlsx]

## Sheet: Sheet1
All values are % as indicated
2E
% of pH3+ cells in SVZ
rostral (Nkx2.1–)	caudal (Nkx2.1+)
13.5855	0
18.3099	0
9.35304	1.5873
17.5	0
12.437	1.13636
7.44401
2G
% of ASCL1+ apical divisions
rostral (Nkx2.1–)	caudal (Nkx2.1+)
7.63757	18.0828
4.43902	21.8254
11.27	20.5088
11.9608	18.7764
8.02282	17.9144
13.035	29.5338
10.4762	21.2798
8.77595	20.4167
