# Supplementary material for: Transcriptional profiling of sequentially generated septal neuron fates
Source: eLife journal article supplement (doi:10.7554/elife.71545), 2021-12-01
Supplement: supp [file elife-71545-supp-v1.zip › elife_poa_e71545_Figure_3_figure_supplement_1_source_data_1.xlsx]

## Sheet: Sheet1
All values are in percentage, as indicated
Figure 3-S1D
% of NeuN+, GFP+ / GFP+
	LSd					LSi					LSv					MS
R	93.4912	92.8931	89.1897	96.8976		89.4697	90.7593	94.2633	94.5793		79.6875	85.188	88.0824	90.9174		86.9565	93.2203	84.375	88.4615
M	89.0306	64.6153	86.86	86.3882		89.824	73.7639	83.8114	84.5491		81.5652	54.8657	83.9827	80.6551		81.8182	71.7949	85.124	79.8077
C	55.86	67.3496	55	72.2222		64.1727	69.8468	57.8853	72.5829		74.734	63.1396	53.9266	72.4803		76.5625	53.5714	69.4737	68.8889
Figure 3-S1E
% of NeuN+, tdT+ / tdT+
	LSd					LSi					LSv					MS
R	56.6667	33.3333	61.1111	75		28.8506	38.7255	39.4063	60.2564		24.6324	22.5	49.3199	42.1769		17.9688	9.09091	7.07071	6.55022
M	73.3333	54.6154	29.1667	26.7857		53.288	48.9231	26.2684	32.7953		43.75	23.9948	39.9306	45.2786		12.6866	18.8811	11.25	7.28745
C	14.8352	44.0476	24.0385	0		25.4167	33.0724	40.6593	12.395		36.9501	54.8077	36.6071	19.1638		15.4167	22.0339	3.31633	6.51042
