# Supplementary material for: Transcriptional profiling of sequentially generated septal neuron fates
Source: eLife journal article supplement (doi:10.7554/elife.71545), 2021-12-01
Supplement: supp [file elife-71545-supp-v1.zip › elife_poa_e71545_Figure_3_source_data_1.xlsx]

## Sheet: Sheet1
All values are in percentage, as indicated
Figure 3B
% of GFP+, NeuN+ / NeuN+
	LSd					LSi					LSv					MS
R	98.2726	88.8	93.5872	96.1538		92.5993	81.982	87.1981	90.6149		76.9048	74.1158	65.847	67.7632		59.6591	36.5979	90.9091	63.2812
M	98.262	93.8272	94.015	95.8692		96.699	88.8087	94.382	87.6957		87.234	80.5774	81.7352	66.2698		40.2941	46.1078	67.3591	51.3089
C	99.5157	95.6169	97.0874	98.2801		97.5728	96.2882	95.8801	98.8571		61.9048	91.8782	73.5043	69.3878		83.0601	33.6842	70.6989	65.6566
Figure 3D
% of tdT+, Zic+ / Zic+
	LSd					LSi					LSv					MS
R	21.3695	20.9595	19.6956	24.0253		32.7665	27.1761	35.6853	28.4528		31.735	13.6985	31.3084	20.6034		6.85714	6.39535	6.66667	4.16667
M	14.6905	7.60234	6.8306	9.10295		33.4944	27.0199	25.5596	21.4573		25.2234	27.5556	25.3186	27.6149		3.49345	2.85714	3.07692	7.40741
C	2.06573	2.35471	3.07607	0.879486		10.8128	11.9856	14.3829	13.4587		14.9502	19.7442	11.2043	13.2774		2.91971	8.39695	2.78481	1.67015
Figure 3F
% of total GFP+ cells in indicated septal nucleus
	LSd					LSi					LSv					MS
R	37.2822	29.8578	25.2174	23.9706		31.3589	43.3649	44.2029	48.6765		15.331	12.7962	21.3043	15.8824		16.0279	13.981	9.27536	11.4706
M	26.8437	27.3316	18.6301	20.0658		39.0855	45.5959	33.9726	39.0351		17.8466	11.9171	30.8219	29.4956		16.2242	15.1554	18.9358	11.4035
C	18.8494	10.1341	11.0647	5.42986		31.0894	34.7243	26.9311	40.2715		34.3941	38.4501	42.1712	33.9367		15.6671	16.6915	19.833	20.362
% of total tdT+ cells in indicated septal nucleus
	LSd					LSi					LSv					MS
R	5.09259	2.57511	3.39806	1.56658		20.3704	19.7425	25.2427	20.3655		15.2778	30.4721	23.301	18.2768		59.2593	47.2103	48.0583	59.7911
M	2.3913	5.63725	1.6129	3.65854		18.4783	25	16.8203	18.5366		20.8696	34.3137	7.8341	17.561		58.2609	35.049	73.7327	60.2439
C	4.96278	3.60169	3.7037	1.06838		19.603	24.3644	4.3573	6.62393		15.8809	22.0339	6.53595	10.2564		59.5533	50	85.4031	82.0513
% of NeuN+, marker+ / marker+
	LS	GFP+	tdT+		MS	GFP+	tdT+
		78.5047	38.149			80.2817	14.7799
		72.733	35.7372			69.0972	18.2004
		80.2347	37.7215			79.6429	6.92308
		84.3653	37.6559			77.2871	6.74419
