# Supplementary material for: Transcriptional profiling of sequentially generated septal neuron fates
Source: eLife journal article supplement (doi:10.7554/elife.71545), 2021-12-01
Supplement: supp [file elife-71545-supp-v1.zip › elife_poa_e71545_Figure_4_figure_supplement_1_source_data_1.xlsx]

## Sheet: Figure 2
All values are % as indicated
2E
% of pH3+ cells in SVZ
rostral (Nkx2.1–)	caudal (Nkx2.1+)
13.5855	0
18.3099	0
9.35304	1.5873
17.5	0
12.437	1.13636
7.44401
2G
% of ASCL1+ apical divisions
rostral (Nkx2.1–)	caudal (Nkx2.1+)
7.63757	18.0828
4.43902	21.8254
11.27	20.5088
11.9608	18.7764
8.02282	17.9144
13.035	29.5338
10.4762	21.2798
8.77595	20.4167

## Sheet: Figures 3 and S4
All values are in percentage, as indicated
Figure 3B
% of GFP+, NeuN+ / NeuN+
	LSd					LSi					LSv					MS
R	98.2726	88.8	93.5872	96.1538		92.5993	81.982	87.1981	90.6149		76.9048	74.1158	65.847	67.7632		59.6591	36.5979	90.9091	63.2812
M	98.262	93.8272	94.015	95.8692		96.699	88.8087	94.382	87.6957		87.234	80.5774	81.7352	66.2698		40.2941	46.1078	67.3591	51.3089
C	99.5157	95.6169	97.0874	98.2801		97.5728	96.2882	95.8801	98.8571		61.9048	91.8782	73.5043	69.3878		83.0601	33.6842	70.6989	65.6566
Figure 3D
% of tdT+, Zic+ / Zic+
	LSd					LSi					LSv					MS
R	21.3695	20.9595	19.6956	24.0253		32.7665	27.1761	35.6853	28.4528		31.735	13.6985	31.3084	20.6034		6.85714	6.39535	6.66667	4.16667
M	14.6905	7.60234	6.8306	9.10295		33.4944	27.0199	25.5596	21.4573		25.2234	27.5556	25.3186	27.6149		3.49345	2.85714	3.07692	7.40741
C	2.06573	2.35471	3.07607	0.879486		10.8128	11.9856	14.3829	13.4587		14.9502	19.7442	11.2043	13.2774		2.91971	8.39695	2.78481	1.67015
Figure 3F
% of total GFP+ cells in indicated septal nucleus
	LSd					LSi					LSv					MS
R	37.2822	29.8578	25.2174	23.9706		31.3589	43.3649	44.2029	48.6765		15.331	12.7962	21.3043	15.8824		16.0279	13.981	9.27536	11.4706
M	26.8437	27.3316	18.6301	20.0658		39.0855	45.5959	33.9726	39.0351		17.8466	11.9171	30.8219	29.4956		16.2242	15.1554	18.9358	11.4035
C	18.8494	10.1341	11.0647	5.42986		31.0894	34.7243	26.9311	40.2715		34.3941	38.4501	42.1712	33.9367		15.6671	16.6915	19.833	20.362
% of total tdT+ cells in indicated septal nucleus
	LSd					LSi					LSv					MS
R	5.09259	2.57511	3.39806	1.56658		20.3704	19.7425	25.2427	20.3655		15.2778	30.4721	23.301	18.2768		59.2593	47.2103	48.0583	59.7911
M	2.3913	5.63725	1.6129	3.65854		18.4783	25	16.8203	18.5366		20.8696	34.3137	7.8341	17.561		58.2609	35.049	73.7327	60.2439
C	4.96278	3.60169	3.7037	1.06838		19.603	24.3644	4.3573	6.62393		15.8809	22.0339	6.53595	10.2564		59.5533	50	85.4031	82.0513
% of NeuN+, marker+ / marker+
	LS	GFP+	tdT+		MS	GFP+	tdT+
		78.5047	38.149			80.2817	14.7799
		72.733	35.7372			69.0972	18.2004
		80.2347	37.7215			79.6429	6.92308
		84.3653	37.6559			77.2871	6.74419
Figure S4D
% of NeuN+, GFP+ / GFP+
	LSd					LSi					LSv					MS
R	93.4912	92.8931	89.1897	96.8976		89.4697	90.7593	94.2633	94.5793		79.6875	85.188	88.0824	90.9174		86.9565	93.2203	84.375	88.4615
M	89.0306	64.6153	86.86	86.3882		89.824	73.7639	83.8114	84.5491		81.5652	54.8657	83.9827	80.6551		81.8182	71.7949	85.124	79.8077
C	55.86	67.3496	55	72.2222		64.1727	69.8468	57.8853	72.5829		74.734	63.1396	53.9266	72.4803		76.5625	53.5714	69.4737	68.8889
Figure S4E
% of NeuN+, tdT+ / tdT+
	LSd					LSi					LSv					MS
R	56.6667	33.3333	61.1111	75		28.8506	38.7255	39.4063	60.2564		24.6324	22.5	49.3199	42.1769		17.9688	9.09091	7.07071	6.55022
M	73.3333	54.6154	29.1667	26.7857		53.288	48.9231	26.2684	32.7953		43.75	23.9948	39.9306	45.2786		12.6866	18.8811	11.25	7.28745
C	14.8352	44.0476	24.0385	0		25.4167	33.0724	40.6593	12.395		36.9501	54.8077	36.6071	19.1638		15.4167	22.0339	3.31633	6.51042

## Sheet: Figures 4 and S5
All values are number of RNAscope puncta counts or the gene of interest normalized by RNAscope puncta counts of the corresponding cell type marker gene (Nes for Fig. 2F and S4E, Ascl1 for Fig. 2G and S4F, and Dcx for Figs. 2H and S4G)
Figure 4
Hmga2 (4F)
	E12				E14
rostral	1.73862	1.73483	1.74502	1.68536	1.61588	1.59037	1.61767
caudal	1.73238	1.72107	1.71484	1.72535	1.66066	1.66205	1.67994	1.65728
Ccnd2 (4G)
	E12				E14
rostral	0.846235	0.858564	0.768976	0.831496	0.9368	0.982656
caudal	0.781244	0.805018	0.853897	0.840804	0.934832	0.854914	0.978732
Prdm16 (4H)
	E12				E14
rostral	1.31172	1.34114	1.43171	1.46706	1.83395	1.85355	1.93478
caudal	1.39472	1.49686	1.50248	1.5446	1.79477	1.84971	1.88038
Figure S5
Hes5 (S5E)
	E12				E14
rostral	1.79919	1.75097	1.90411	1.88826	2.03227	1.84563	1.92247
caudal	1.79313	1.81473	1.78466	1.85062	1.86928	1.94616	1.92141	2.09325
Ccnd1 (S5F)
	E12				E14
rostral	0.512217	0.519779	0.476254	0.499001	0.552325	0.543664
caudal	0.468262	0.474968	0.496487	0.487277	0.563312	0.54452	0.550902
Nfia (S5G)
	E12				E14
rostral	1.79079	1.64101	1.55128	1.63405	1.76624	1.70013	1.89931
caudal	1.63509	1.64716	1.48238	1.6972	1.86779	1.86881	1.90491

## Sheet: Figures 5 and S6
Values are % of labeled cells located in the corresponding septal nucleus (Fig.4E), or % of cells belonging to the indicated morphological type (Figs. 4G, S6A, S6B), after tamoxifen induction at the indicated developmental stage(s)
Figure 5
cell location (5E)
	LSd							LSi							LSv						MS
E10	6.55738	9.09091	0	23.1527				44.2623	48.4849	53.8462	33.9901				36.0656	27.2727	38.4615	30.5419			13.1148	15.1515	7.69231	12.3153
E12	14.9254	10.3448	20	20.4748				49.2537	53.3469	47.4419	44.8071				34.3284	33.0629	30.6977	30.2671			1.49254	3.24544	1.86047	4.45104
E14	0	0	0.52356	0.990099	1.31579	0		34.0136	25	43.9791	34.6535	24.3421	31.3131		64.6259	72.2222	52.356	61.3861	70.3947		1.36054	2.77778	3.14136	2.9703	3.94737	6.06061
E16	0	0						0	2.63158						88.5714	97.3684					11.4286	0
morphology distribution (5G)
	type I								type II								type III
E10	3.77358	7.14286	0	2.24719					83.0189	78.5714	91.6667	96.0674					13.2075	14.2857	8.33333	1.68539
E12	11.6162	6.91824	6.3981	9.31677					81.8182	84.0671	84.3602	81.3665					6.56566	9.01468	9.24171	9.31677
E14	4.13793	10	2.85714	5.94595	5.10204	1.36986	6.45161		82.7586	67.5	71.4286	71.8919	72.449	75.3425	74.1935		13.1034	22.5	25.7143	22.1622	22.449	23.2877	19.3548
E16	0	0							100	100							0	0
Figure S6
morphology distribution by nucleus (S6A)
	LSd
	type I					type II					type III
E10	0	33.3333	6.38298			75	66.6667	89.3617			25	0	4.25532
E12	33.3333	21.5686	17.4419	21.7391		46.6667	50.9804	54.6512	66.6667		20	27.451	27.907	11.5942
E14	50	0	0	0		50	100	0	100		0	0	100	0
	LSi
	type I								type II								type III
E10	7.40741	6.25	0	0					70.3704	68.75	85.7143	98.5507					22.2222	25	14.2857	1.44928
E12	12.1212	8.36502	5.88235	9.93378					80.8081	80.6084	86.7647	76.1589					7.07071	11.0266	7.35294	13.9073
E14	10	10	11.1111	13.0952	14.2857	2.7027	19.3548		56	60.9375	33.3333	53.5714	37.1429	56.7568	51.6129		34	28.125	55.5556	33.3333	48.5714	40.5405	29.0323
	LSv
	type I								type II								type III
E10	0	0	0	1.6129					100	100	100	98.3871					0	0	0	0
E12	1.44928	0	0	0					98.5507	100	100	99.0196					0	0	0.980392	0
E14	2.10526	0	0	0	0	0.934579	0		96.8421	100	84.6154	87	93.5484	81.3084	85.4839		1.05263	0	15.3846	13	6.45161	17.757	14.5161
E16	0	0							100	100							0	0
type II subtypes (S6B)
	type Iia						type Iib						type Iic
LSd	0	0					0	0					100	100
LSi	33.3333	20	15.3846	22.7273	17.6471		11.1111	26.6667	46.1538	18.1818	17.6471		55.5556	53.3333	38.4615	59.0909	64.7059
LSv	14.4927	18.3908	18.9655	16.092	16.9811		30.4348	27.5862	29.3103	12.6437	16.9811		55.0725	54.023	51.7241	71.2644	66.0377
