# Supplementary material for: Transcriptional profiling of sequentially generated septal neuron fates
Source: eLife journal article supplement (doi:10.7554/elife.71545), 2021-12-01
Supplement: supp [file elife-71545-supp-v1.zip › elife_poa_e71545_Figure_4_source_data_1.xlsx]

## Sheet: Sheet1
All values are number of RNAscope puncta counts or the gene of interest normalized by RNAscope puncta counts of the corresponding cell type marker gene (Nes for Fig. 2F and S4E, Ascl1 for Fig. 2G and S4F, and Dcx for Figs. 2H and S4G)
Figure 4
Hmga2 (4F)
	E12				E14
rostral	1.73862	1.73483	1.74502	1.68536	1.61588	1.59037	1.61767
caudal	1.73238	1.72107	1.71484	1.72535	1.66066	1.66205	1.67994	1.65728
Ccnd2 (4G)
	E12				E14
rostral	0.846235	0.858564	0.768976	0.831496	0.9368	0.982656
caudal	0.781244	0.805018	0.853897	0.840804	0.934832	0.854914	0.978732
Prdm16 (4H)
	E12				E14
rostral	1.31172	1.34114	1.43171	1.46706	1.83395	1.85355	1.93478
caudal	1.39472	1.49686	1.50248	1.5446	1.79477	1.84971	1.88038
