# Supplementary material for: Transcriptional profiling of sequentially generated septal neuron fates
Source: eLife journal article supplement (doi:10.7554/elife.71545), 2021-12-01
Supplement: supp [file elife-71545-supp-v1.zip › elife_poa_e71545_Figure_5_figure_supplement_1_source_data_1.xlsx]

## Sheet: Sheet1
Values are % of labeled cells located in the corresponding septal nucleus (Fig.4E), or % of cells belonging to the indicated morphological type (Figs. 4G, S6A, S6B), after tamoxifen induction at the indicated developmental stage(s)
Figure 5-S1
morphology distribution by nucleus (5-S1A)
	LSd
	type I					type II					type III
E10	0	33.3333	6.38298			75	66.6667	89.3617			25	0	4.25532
E12	33.3333	21.5686	17.4419	21.7391		46.6667	50.9804	54.6512	66.6667		20	27.451	27.907	11.5942												6.06061
E14	50	0	0	0		50	100	0	100		0	0	100	0
	LSi
	type I								type II								type III
E10	7.40741	6.25	0	0					70.3704	68.75	85.7143	98.5507					22.2222	25	14.2857	1.44928
E12	12.1212	8.36502	5.88235	9.93378					80.8081	80.6084	86.7647	76.1589					7.07071	11.0266	7.35294	13.9073
E14	10	10	11.1111	13.0952	14.2857	2.7027	19.3548		56	60.9375	33.3333	53.5714	37.1429	56.7568	51.6129		34	28.125	55.5556	33.3333	48.5714	40.5405	29.0323
	LSv
	type I								type II								type III
E10	0	0	0	1.6129					100	100	100	98.3871					0	0	0	0
E12	1.44928	0	0	0					98.5507	100	100	99.0196					0	0	0.980392	0
E14	2.10526	0	0	0	0	0.934579	0		96.8421	100	84.6154	87	93.5484	81.3084	85.4839		1.05263	0	15.3846	13	6.45161	17.757	14.5161
E16	0	0							100	100							0	0
type II subtypes (5-S1B)
	type Iia						type Iib						type Iic
LSd	0	0					0	0					100	100
LSi	33.3333	20	15.3846	22.7273	17.6471		11.1111	26.6667	46.1538	18.1818	17.6471		55.5556	53.3333	38.4615	59.0909	64.7059
LSv	14.4927	18.3908	18.9655	16.092	16.9811		30.4348	27.5862	29.3103	12.6437	16.9811		55.0725	54.023	51.7241	71.2644	66.0377
