# Supplementary material for: Transcriptional profiling of sequentially generated septal neuron fates
Source: eLife journal article supplement (doi:10.7554/elife.71545), 2021-12-01
Supplement: supp [file elife-71545-supp-v1.zip › elife_poa_e71545_Figure_5_source_data_1.xlsx]

## Sheet: Sheet1
Values are % of labeled cells located in the corresponding septal nucleus (Fig.4E), or % of cells belonging to the indicated morphological type (Figs. 4G, S6A, S6B), after tamoxifen induction at the indicated developmental stage(s)
Figure 5
cell location (5E)
	LSd							LSi							LSv						MS
E10	6.55738	9.09091	0	23.1527				44.2623	48.4849	53.8462	33.9901				36.0656	27.2727	38.4615	30.5419			13.1148	15.1515	7.69231	12.3153
E12	14.9254	10.3448	20	20.4748				49.2537	53.3469	47.4419	44.8071				34.3284	33.0629	30.6977	30.2671			1.49254	3.24544	1.86047	4.45104
E14	0	0	0.52356	0.990099	1.31579	0		34.0136	25	43.9791	34.6535	24.3421	31.3131		64.6259	72.2222	52.356	61.3861	70.3947		1.36054	2.77778	3.14136	2.9703	3.94737	6.06061
E16	0	0						0	2.63158						88.5714	97.3684					11.4286	0
morphology distribution (5G)
	type I								type II								type III
E10	3.77358	7.14286	0	2.24719					83.0189	78.5714	91.6667	96.0674					13.2075	14.2857	8.33333	1.68539
E12	11.6162	6.91824	6.3981	9.31677					81.8182	84.0671	84.3602	81.3665					6.56566	9.01468	9.24171	9.31677
E14	4.13793	10	2.85714	5.94595	5.10204	1.36986	6.45161		82.7586	67.5	71.4286	71.8919	72.449	75.3425	74.1935		13.1034	22.5	25.7143	22.1622	22.449	23.2877	19.3548
E16	0	0							100	100							0	0
