# Supplementary figures and images for: Transcriptional profiling of sequentially generated septal neuron fates
Source: eLife journal article supplement (doi:10.7554/elife.71545), 2021-12-01

Figure 1 - figure supplement 1

A

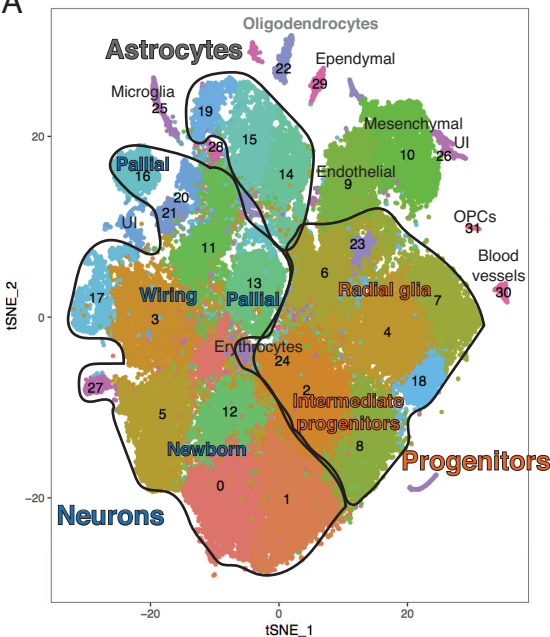

B

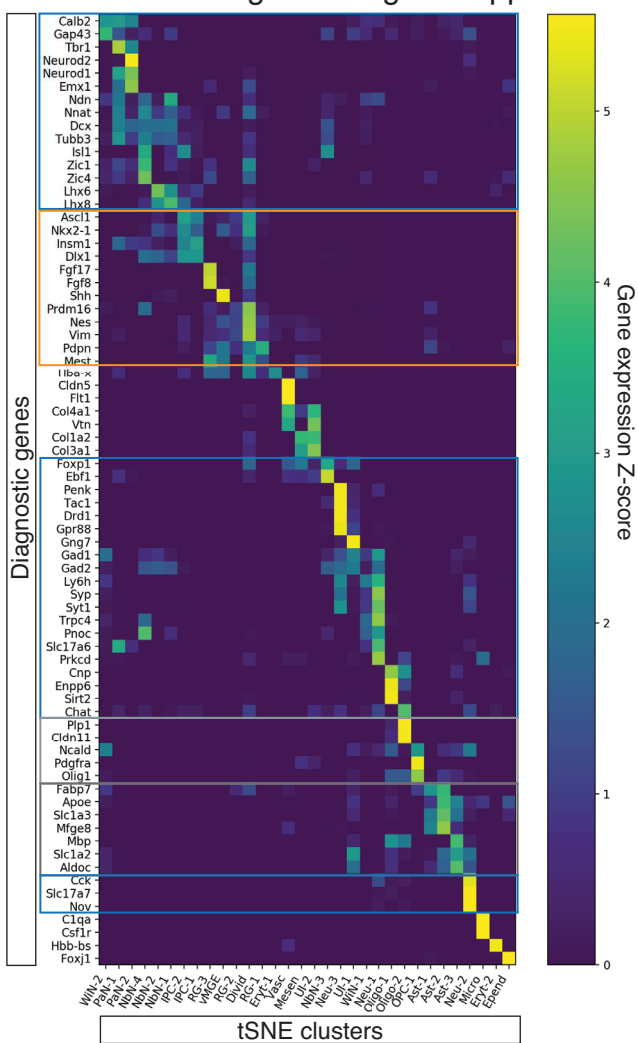

C

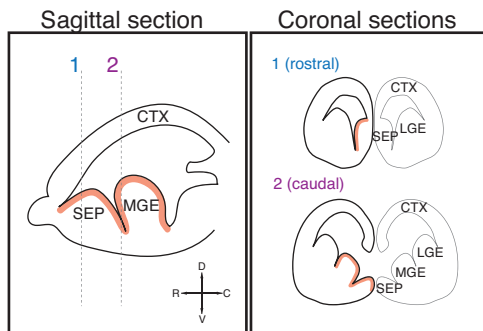

Supplement: supp [file elife-71545-supp-v1.zip › elife_poa_e71545_Figure_1_figure_supplement_1.pdf]

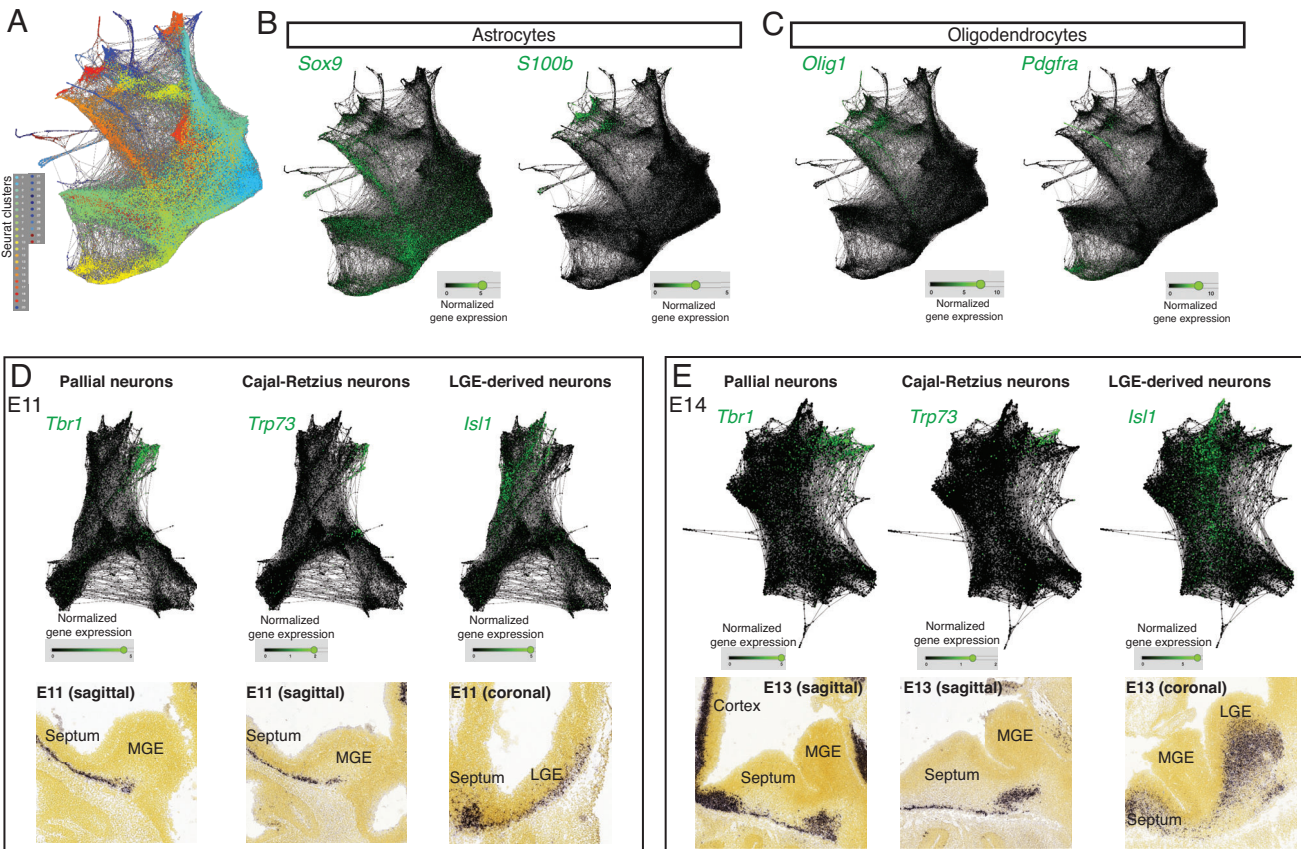

Figure 1 - figure supplement 2

Supplement: supp [file elife-71545-supp-v1.zip › elife_poa_e71545_Figure_1_figure_supplement_2.pdf]

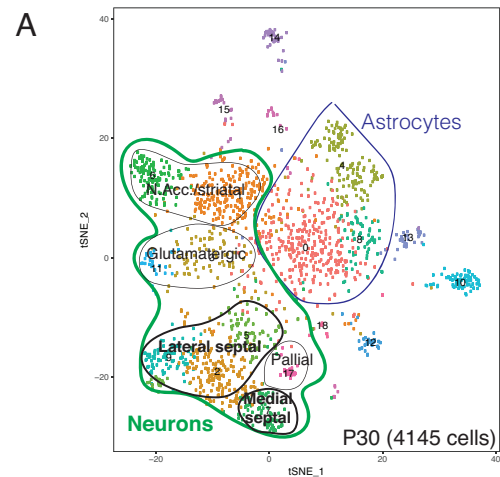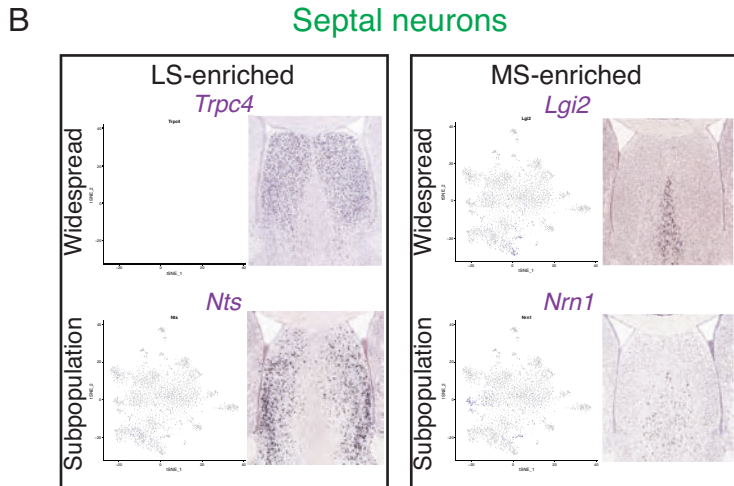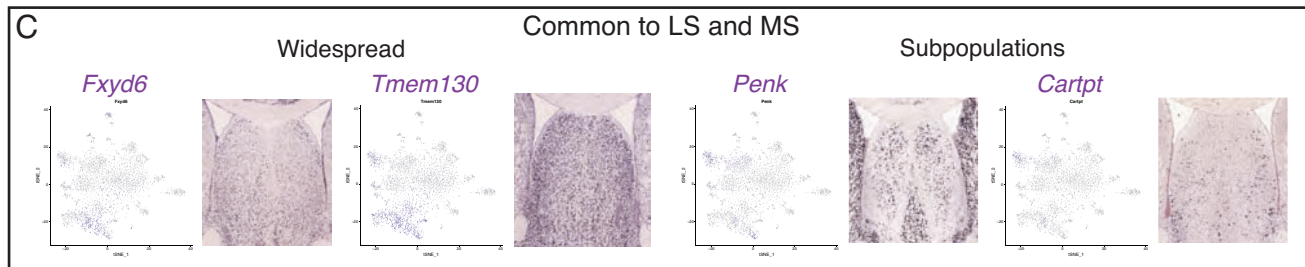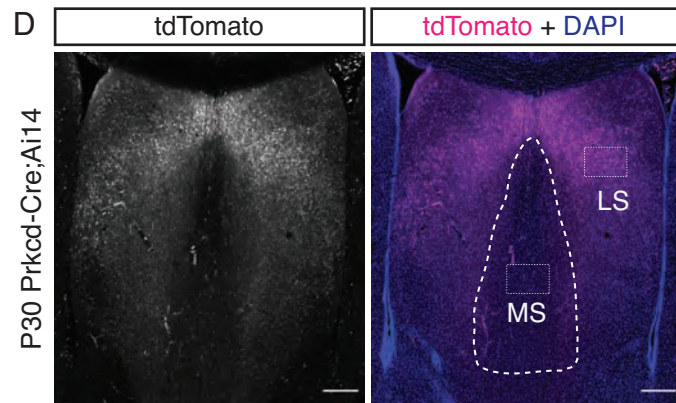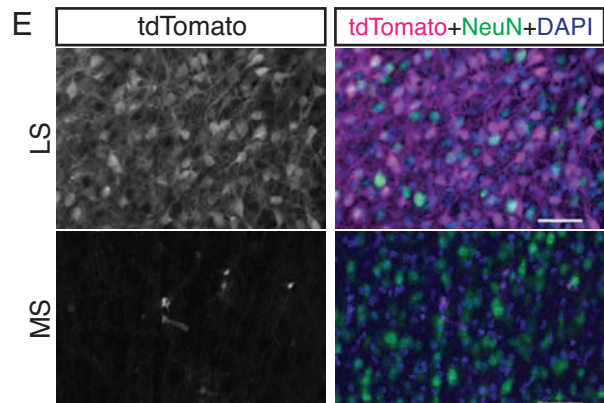

Figure 1 - figure supplement 3

Supplement: supp [file elife-71545-supp-v1.zip › elife_poa_e71545_Figure_1_figure_supplement_3.pdf]

A

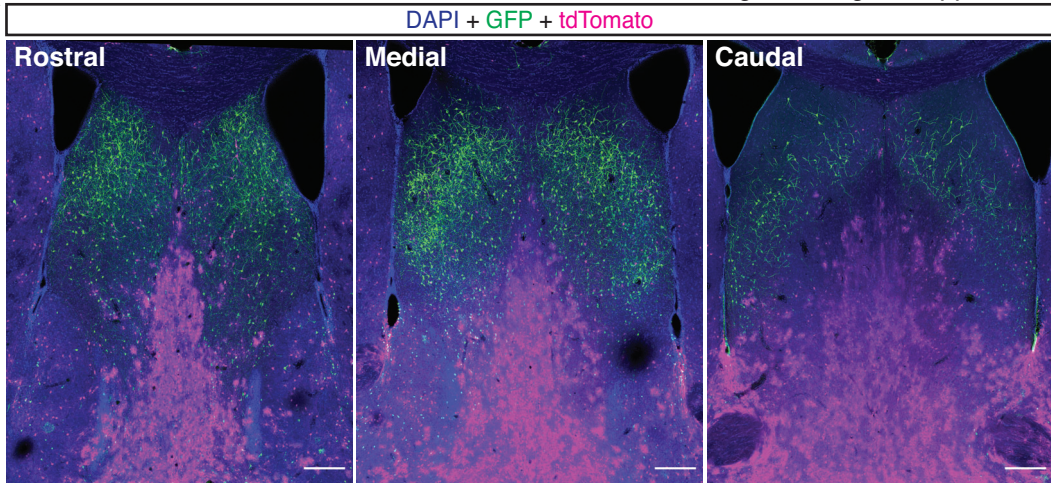

B

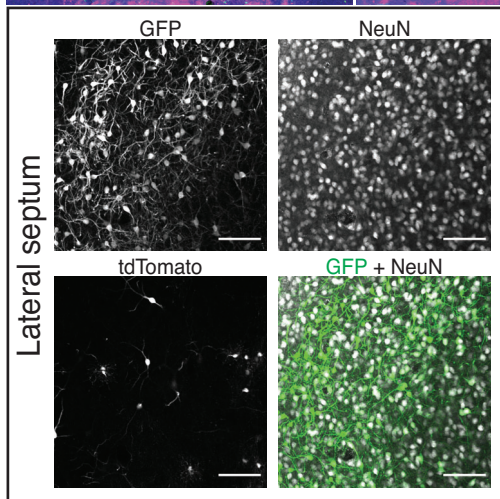

C

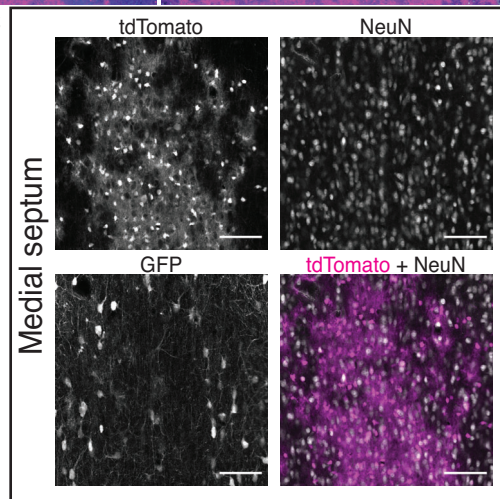

D

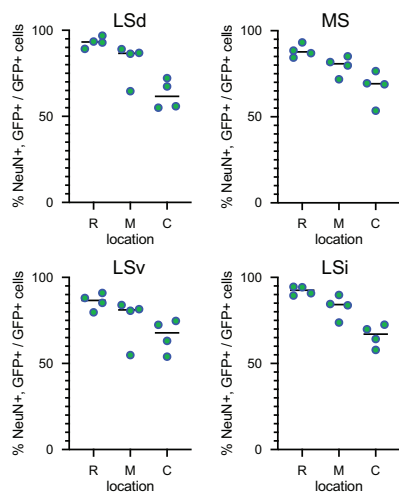

E

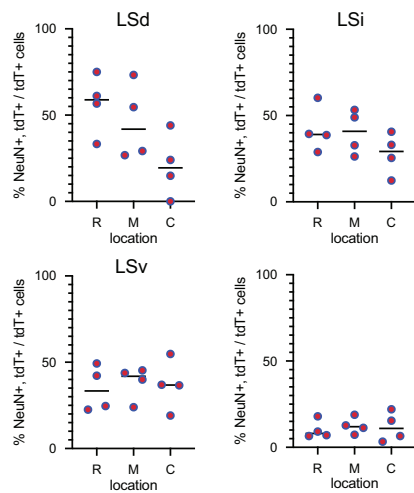

Supplement: supp [file elife-71545-supp-v1.zip › elife_poa_e71545_Figure_3_figure_supplement_1.pdf]

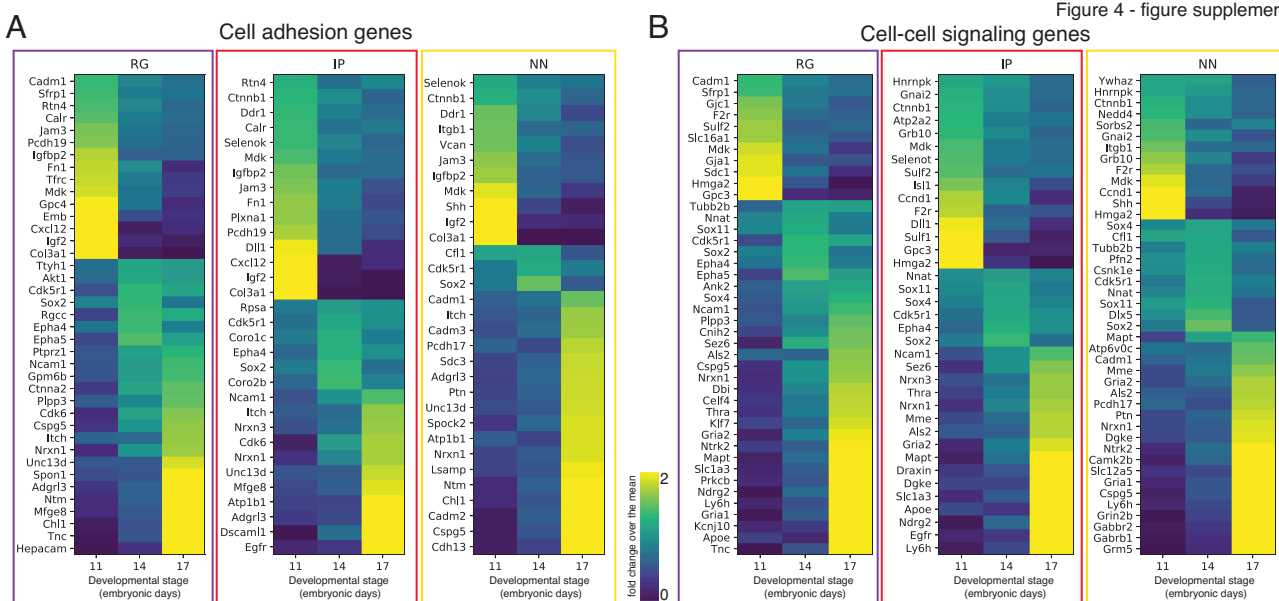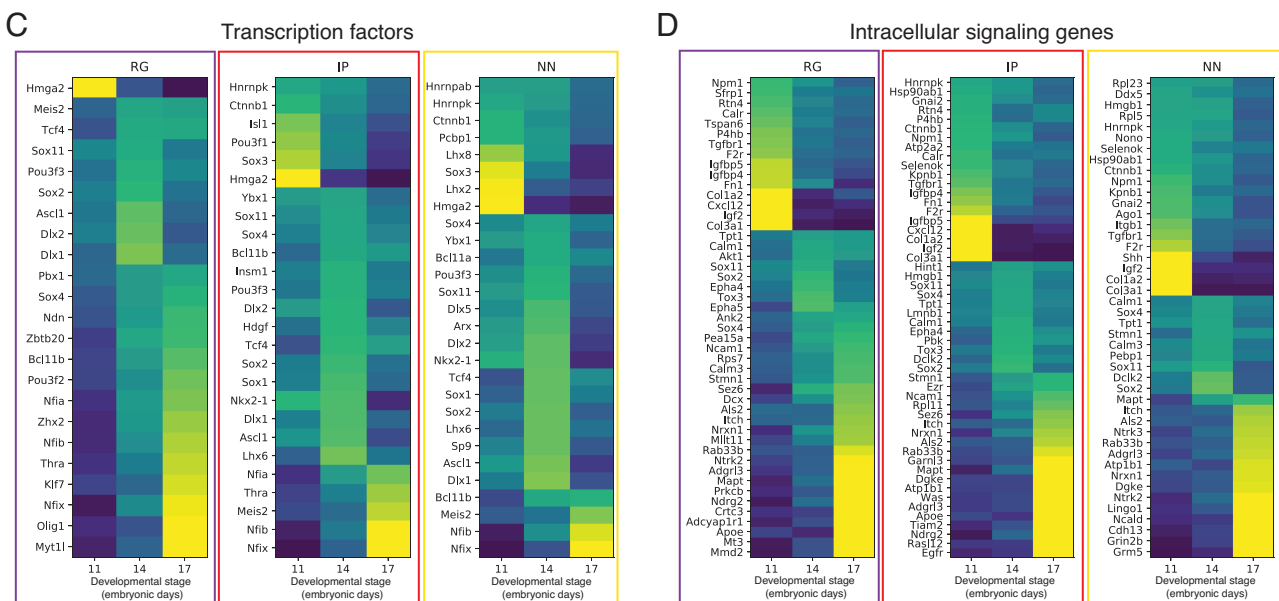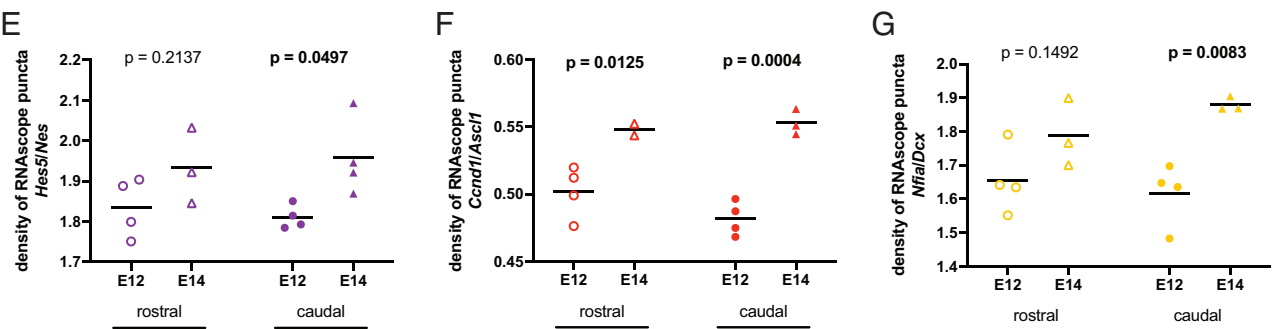

Supplement: supp [file elife-71545-supp-v1.zip › elife_poa_e71545_Figure_4_figure_supplement_1.pdf]

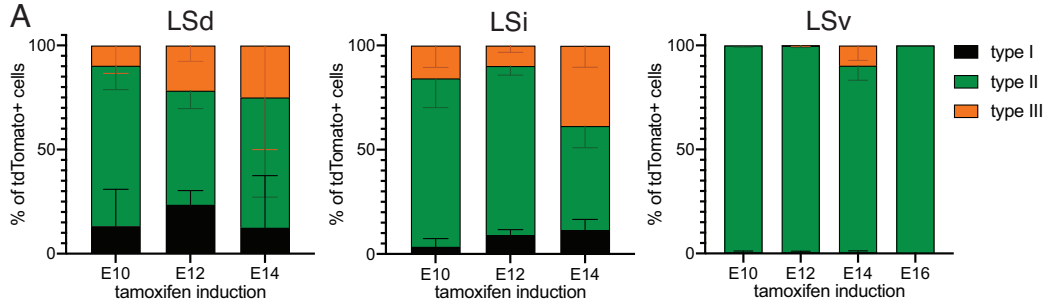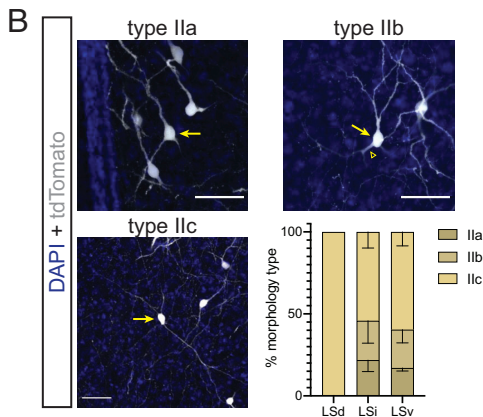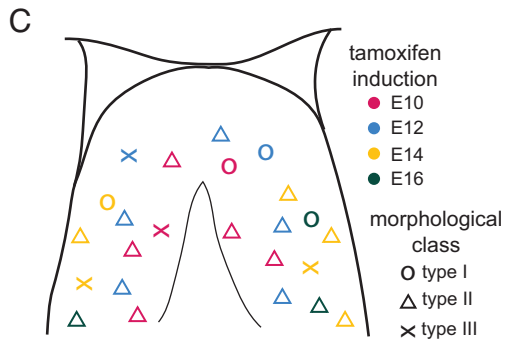

Figure 5 - figure supplement 1

Supplement: supp [file elife-71545-supp-v1.zip › elife_poa_e71545_Figure_5_figure_supplement_1.pdf]
